# Supplementary material for: Electrochemical dealloying as a tool to tune the porosity, composition and catalytic activity of nanomaterials
Source: Royal Society of Chemistry journal article supplement (doi:10.1039/d0ta04880a), 2020-01-01
Supplement: d0ta04880a1.pdf [file d0ta04880a1.pdf]

## Electronic Supplementary Information

### Electrochemical Dealloying as a Tool to Tune Porosity, Composition and Catalytic Activity of Nanomaterials

Christian Rurainsky,<sup>a</sup> Alba Garzón Manjón<sup>b</sup>, Felix Hiege<sup>a</sup>, Yen-Ting Chen<sup>c</sup>, Christina Scheu<sup>\*b</sup> and Kristina Tschulik<sup>\*a</sup>

#### **S 1 Nanoparticle characterization**

**Table S1.** Nanoparticles size measured with TEM, relative molar amount of Ag remaining in AgAu nanoparticles after dealloying for various numbers of cycles, determined by electrochemical dissolution in HCl and measured catalytic current density at -1.1 V vs. MSE in 0.5 M H<sub>2</sub>SO<sub>4</sub>.

|             | Size   | Ag content | Catalytic current density |
|-------------|--------|------------|---------------------------|
|             | [nm]   | [mol%]     | [mol/cm <sup>2</sup> ]    |
| AgAu        | 30 ±9  | 83 ±6      | 9 ±4                      |
| 0.5 cycles  | 29 ±10 | 66 ±11     | 124 ±40                   |
| 100 cycles  | 26 ±10 | 18 ±10     | 254 ±58                   |
| 500 cycles  | 25 ±9  | 21 ±4      | 76 ±10                    |
| 1000 cycles |        | 25 ±7      | 103 ±25                   |
| 2000 cycles |        | 22 ±6      | 97 ±10                    |
| 4000 cycles |        | 14 ±9      | 77 ±23                    |

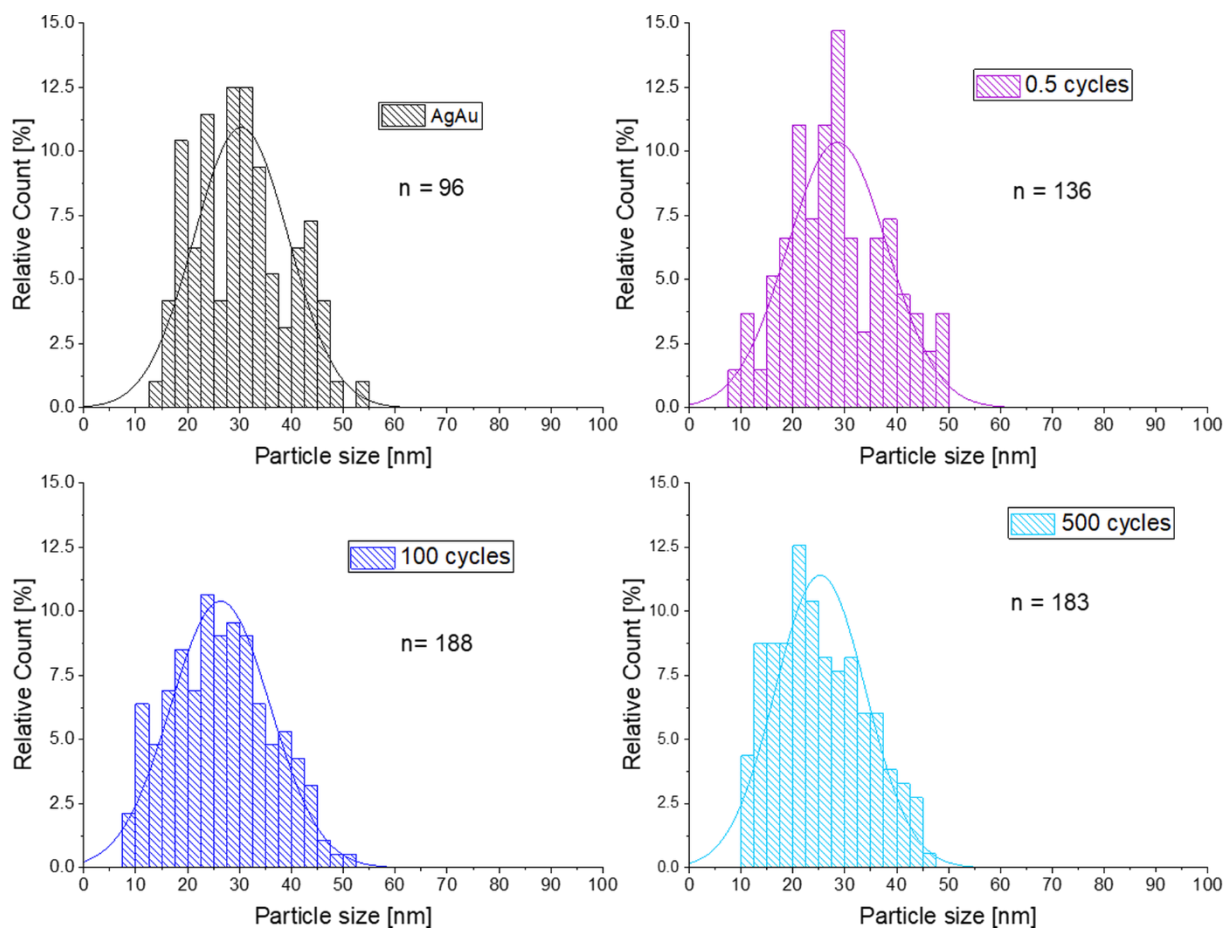

**Figure S1.** Histograms of the size determination of the AgAu nanoparticles, without treatment, after 0.5 cycles, after 100 cycles and after 500 cycles.

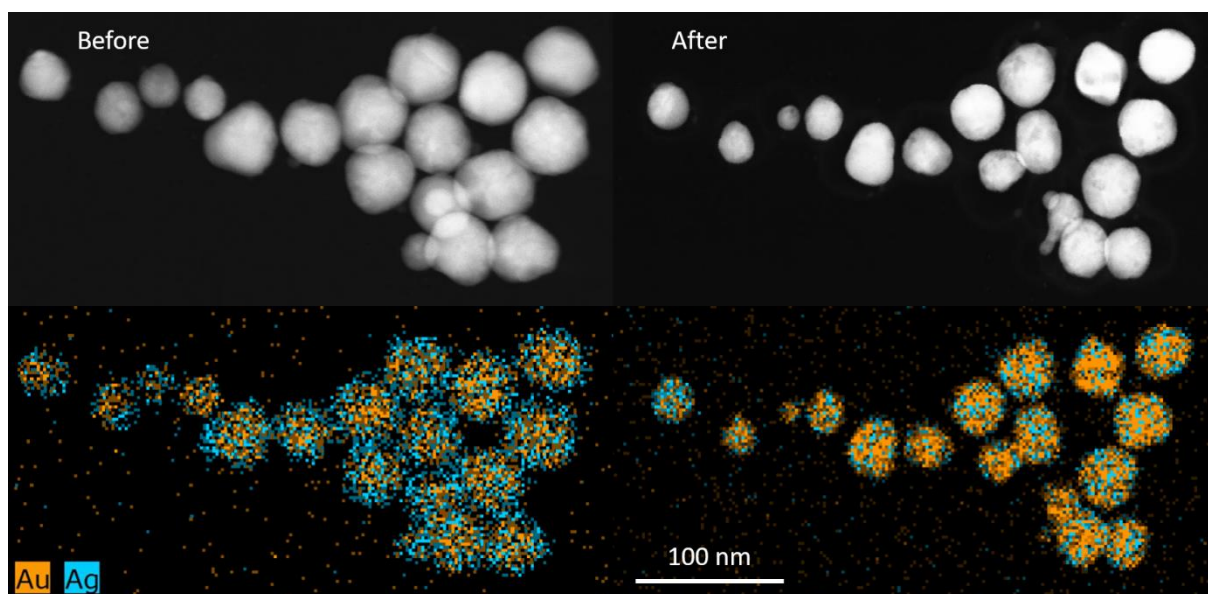

**Figure S2.** Identical location TEM with STEM images, SEI and EDX mapping, before and after dealloying for 100 cycles in 1 M HClO<sub>4</sub>.

## S 2 Electrocatalytic Response

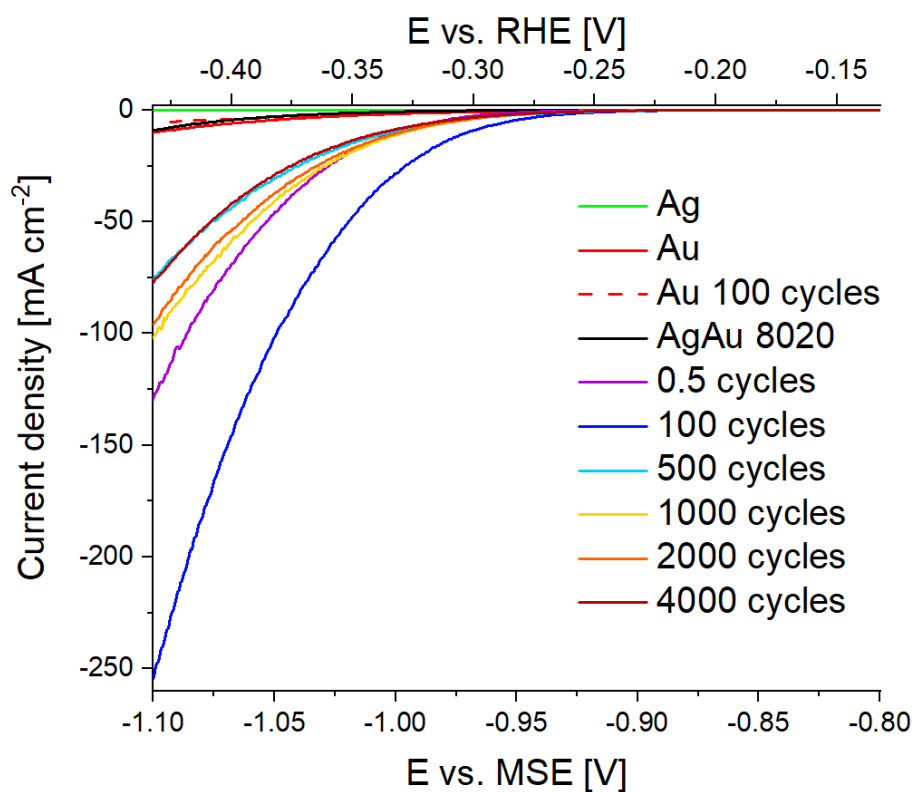

**Figure S3.** Averaged catalytic LSV curves at  $2 \text{ mV s}^{-1}$  in  $0.5 \text{ M H}_2\text{SO}_4$  using pure silver, pure gold, 100 cycles “dealloyed” gold, non-dealloyed AgAu 80:20 and dealloyed AgAu nanoparticles at different amount of cycles, the currents are normalised to the electrochemically determined surface area of the particles.
